# Supplementary material for: Molecular mechanism of monodisperse colloidal tin-doped indium oxide nanocrystals by a hot-injection approach
Source: PubMed Central journal article supplement (PMC3626570; doi:10.1186/1556-276x-8-153), 2013-04-02
Supplement: 1556-276X-8-153-S1.pdf [file 1556-276X-8-153-S1.pdf]

## Supporting Information

# Molecular Mechanism of Monodisperse Colloidal Tin Doped Indium Oxide Nanocrystals by a Hot-injection Approach

Yizheng Jin<sup>1,2,3\*</sup>, Qing Yi<sup>1</sup>, Yuping Ren<sup>1</sup>, Xin Wang<sup>1</sup>, and Zhizhen Ye<sup>1,2\*</sup>

<sup>1</sup> *State Key Laboratory of Silicon Materials, Department of Materials Science and Engineering, Zhejiang University, Hangzhou 310027, People's Republic of China*

<sup>2</sup> *Cyrus Tang Center for Sensor Materials and Applications, Zhejiang University Hangzhou 310027, People's Republic of China*

<sup>3</sup> *College of Chemistry & Materials Engineering, Wenzhou University, Zhejiang Province, Wenzhou 325027, People's Republic of China*

*Corresponding authors: [yizhengjin@zju.edu.cn](mailto:yizhengjin@zju.edu.cn) (Dr. Yizheng Jin)*

*& [yez@zju.edu.cn](mailto:yez@zju.edu.cn) (Prof. Zhizhen Ye)*

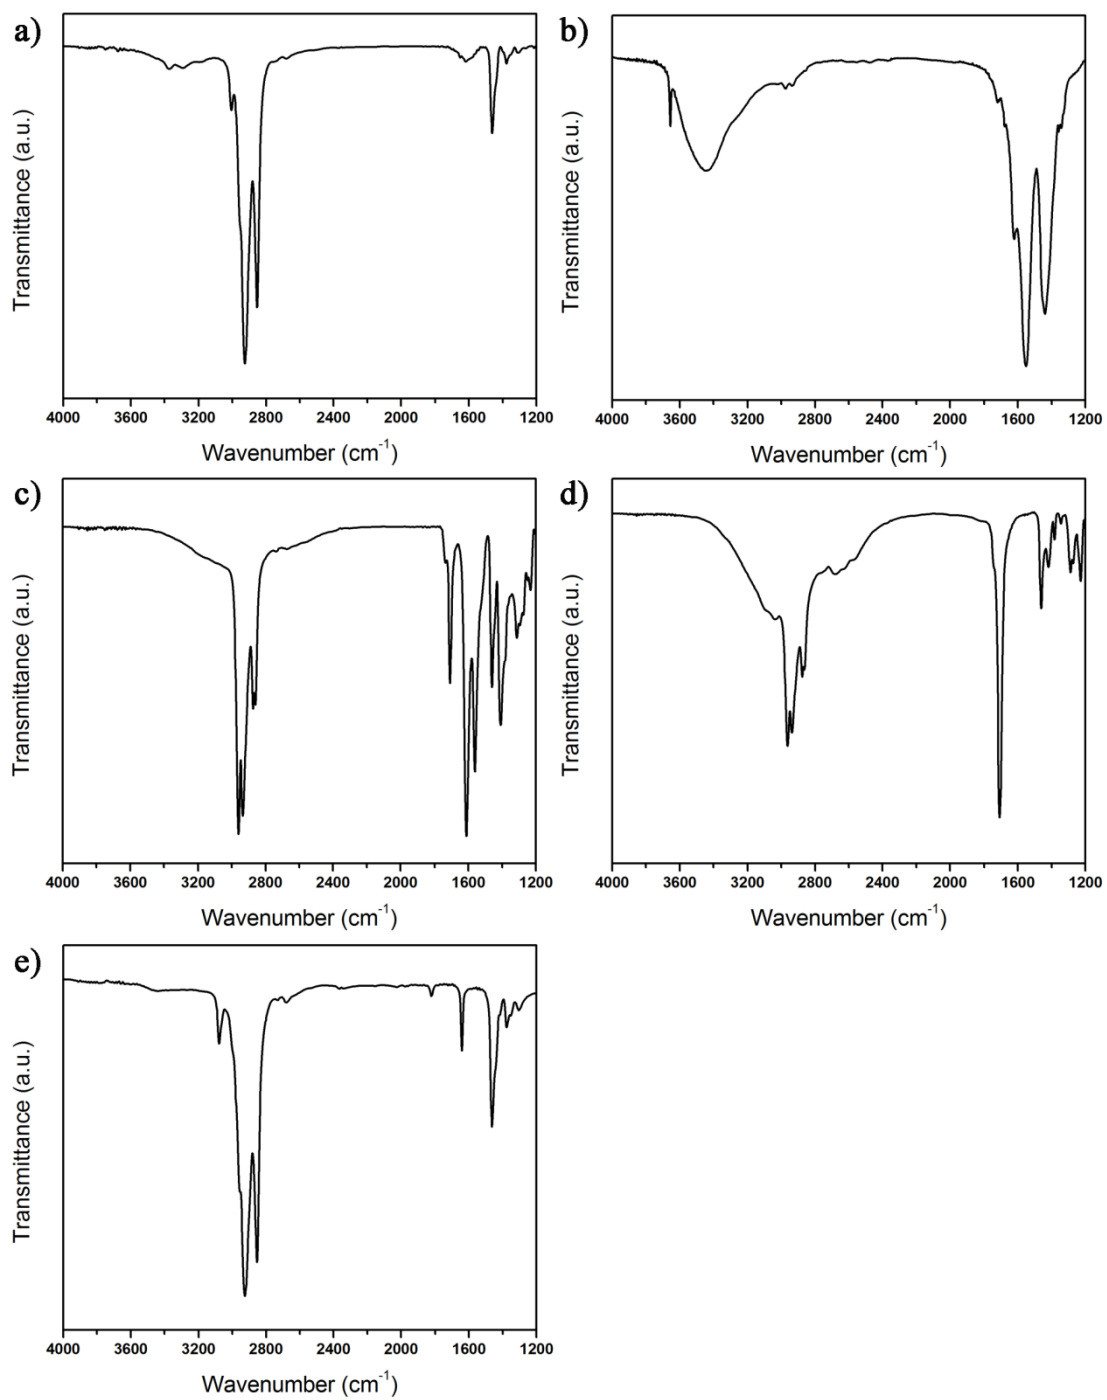

**Figure S1 FTIR spectra of a) oleylamine, b) indium acetate, c) tin(II) 2-ethylhexanate, d) 2-ethylhexanoic acid and e) ODE, respectively.**

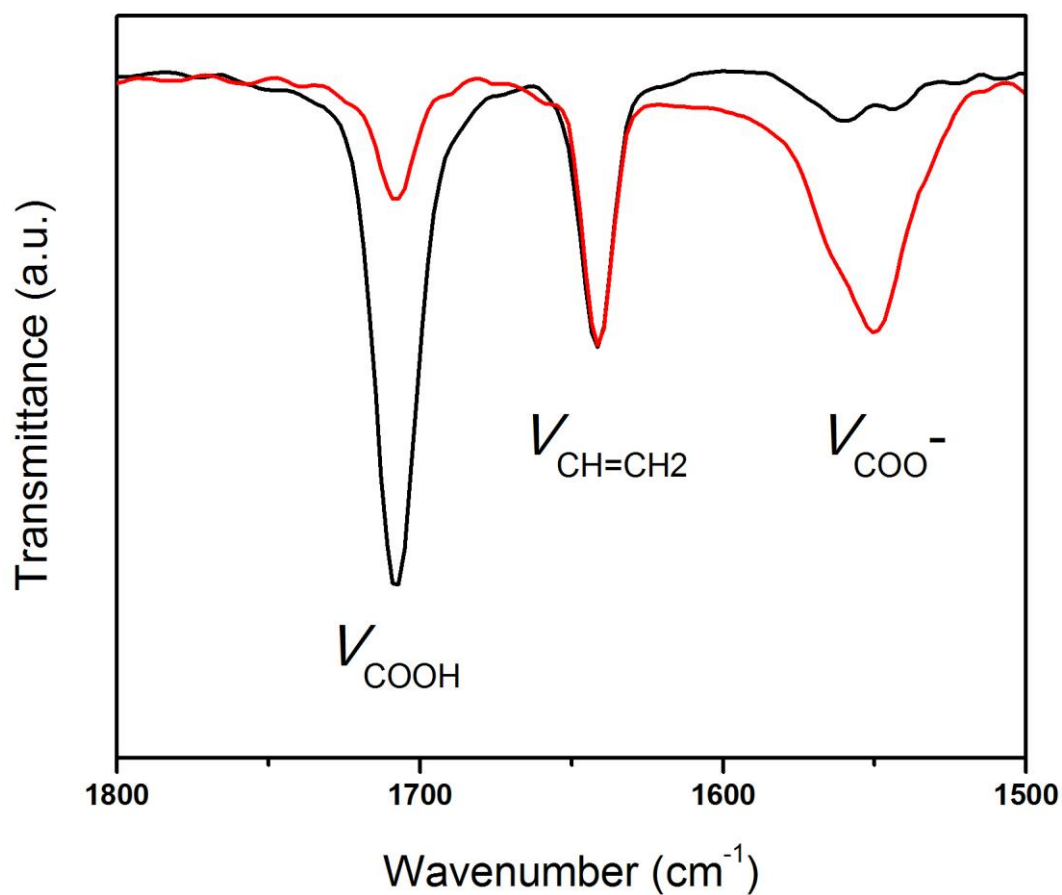

**Figure S2 FTIR spectra of the mixture of indium acetate (1.2 mmol), 2-ethylhexanoic acid (3.6 mmol) and ODE (10 ml) before (25 °C) and after ligand exchange at 290 °C for one hour. The proportion of 2-ethylhexanoate to the acetate groups was determined by estimating the remaining 2-ethylhexanoic acid in solution derived from the calculations of the absorption peak area in the corresponding FTIR spectra.**

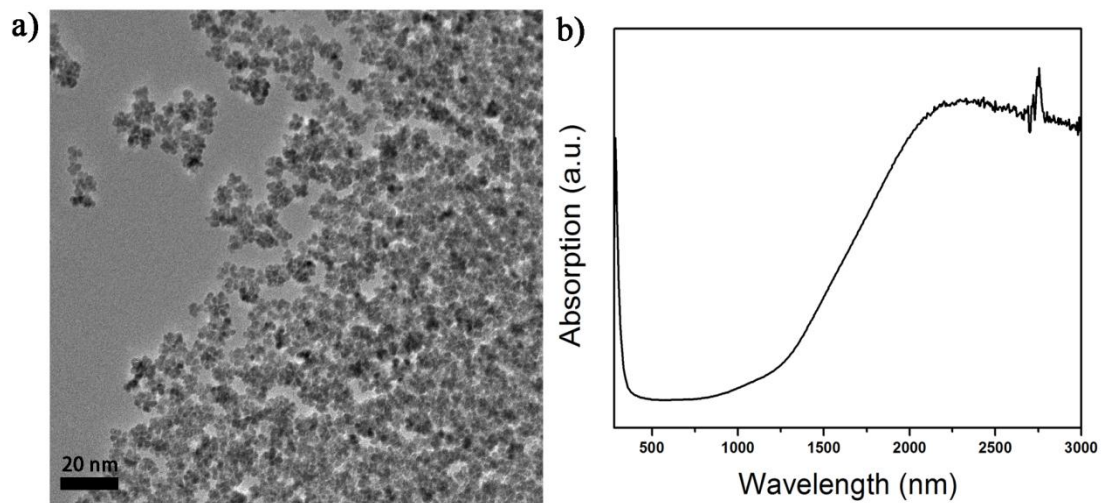

**Figure S3 ITO nanoflowers from the reactions using *n*-octanoic acid in the reagents. a) a typical TEM image and b) UV-Vis-NIR spectrum.**

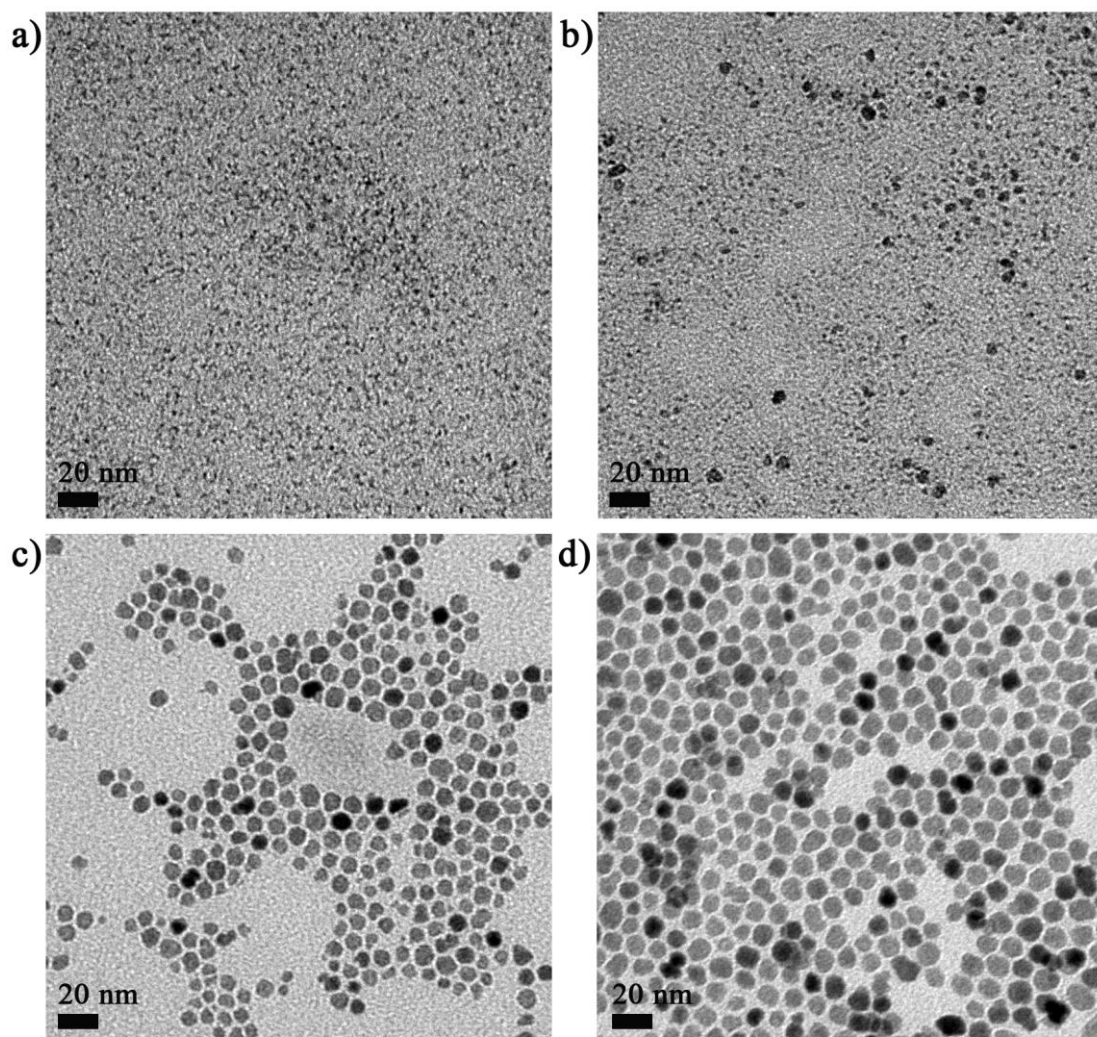

**Figure S4 Temporal evolution of the morphologies of the ITO nanocrystals.**

a)-d)TEM images were recorded from the nanocrystals in the aliquots which were taken from the reaction flask at 3, 8, 20 and 30 min, respectively.

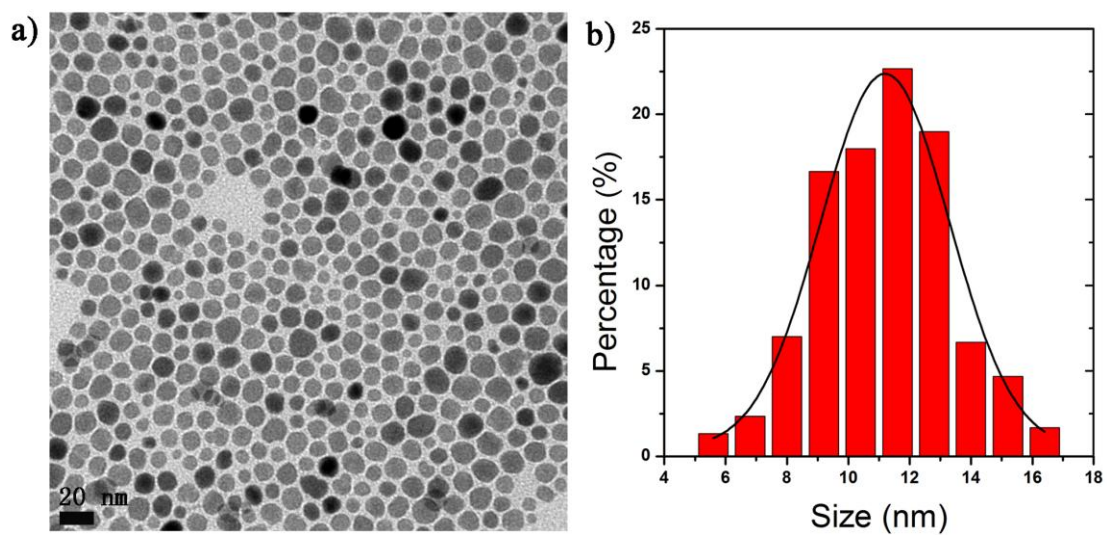

**Figure S5 ITO nanocrystals (10 mol.% of tin precursor) obtained by the Masayuki method.** a) a typical TEM image and b) the corresponding histogram showing the size distribution of  $11.2 \pm 2.1$  nm.

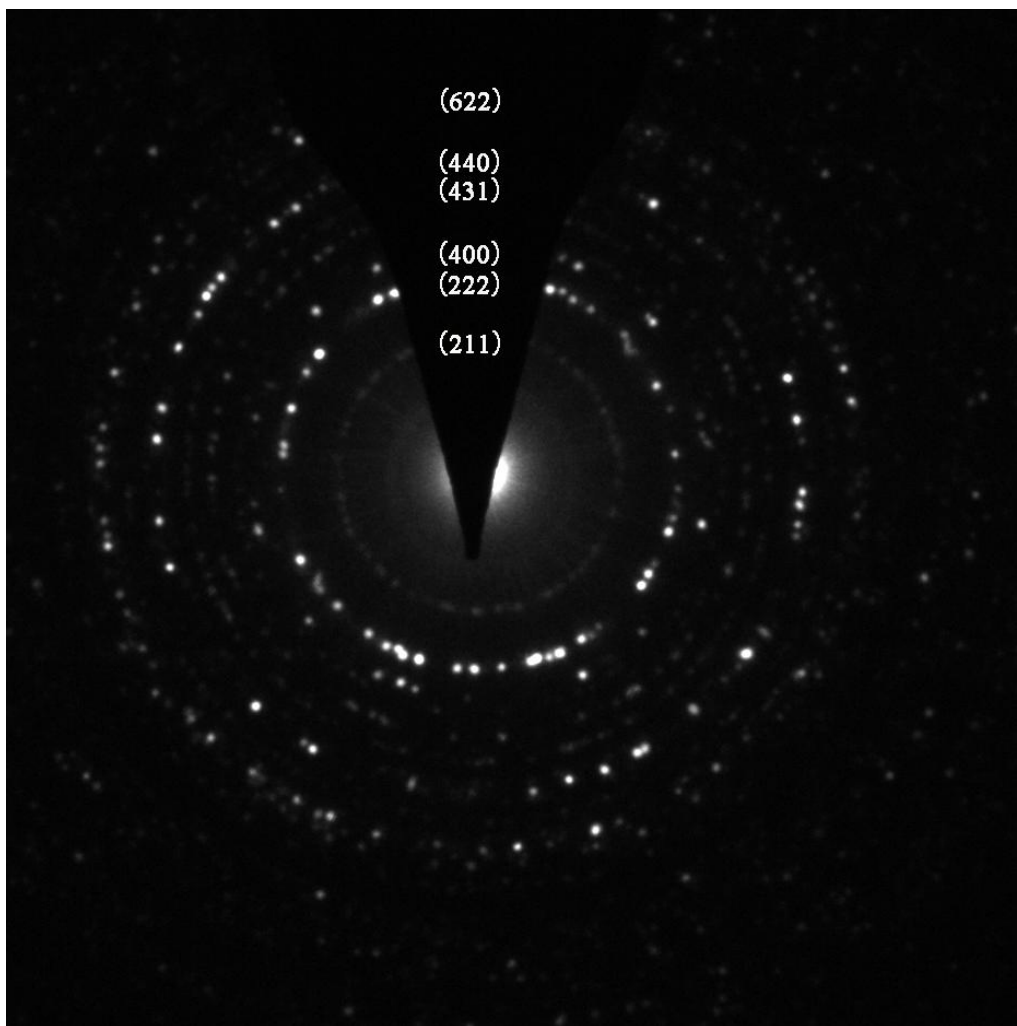

**Figure S6** Electron diffraction pattern of the ITO nanocrystals.

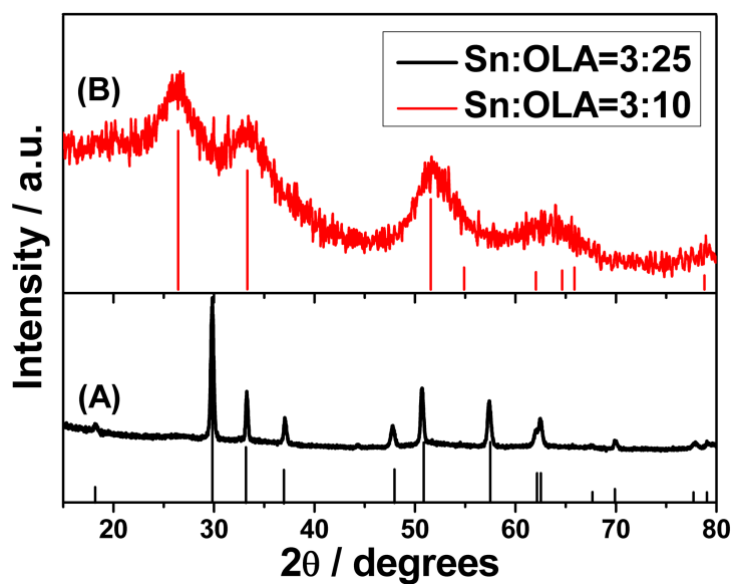

**Figure S7** XRD patterns of the products prepared by aminolysis of different amounts of tin(II) 2-ethylhexanoate in oleylamine at 280 °C for 1 h. The results suggest that both (A) SnO and (B) SnO<sub>2</sub> (JCPDS patterns of PDF#06-0395 and PDF#41-1445) may be obtained depending on the reaction conditions.



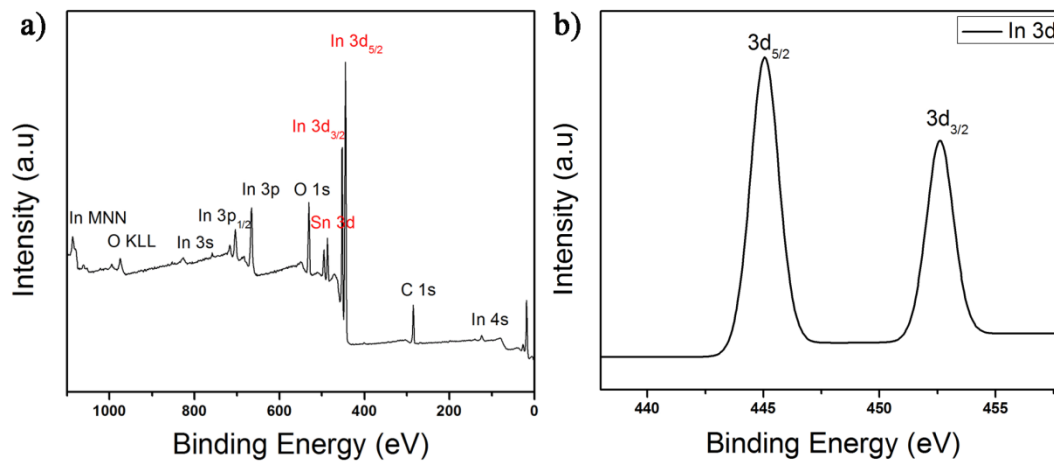

**Figure S8 XPS spectra of the ITO nanocrystals from the hot-injection approach.**

a) wide scan of the ITO nanocrystals and b) narrow scan of the In 3d peaks.
